# Supplementary material
Source: publisher figshare collection journal article supplement (https://karger.figshare.com/ndownloader/files/37560838)
Supplement: Supplementary file 1 [file 37560838]

Supplementary Table 2.Overall, complete, and qualified success rates at years 1 and 2
(PP population).

|  | Analysis visit | Overall population (*N* = 61) |
| --- | --- | --- |
| Overall success, % (*n/N*) |  |  |
| IOP ≥6 mmHg and <21 mmHg | Year 1  Year 2 | 80.3 (49/61) 75.4 (46/61) |
| IOP ≥6 mmHg and <18 mmHg | Year 1  Year 2 | 75.4 (46/61) 72.1 (44/61) |
| IOP ≥6 mmHg and <14 mmHg | Year 1  Year 2 | 68.9 (42/61) 68.9 (42/61) |
| Complete success, % (*n/N*) |  |  |
| IOP ≥6 mmHg and <21 mmHg | Year 1  Year 2 | 54.1 (33/61) 45.9 (28/61) |
| IOP ≥6 mmHg and <18 mmHg | Year 1  Year 2 | 54.1 (33/61) 45.9 (28/61) |
| IOP ≥6 mmHg and <14 mmHg | Year 1  Year 2 | 47.5 (29/61) 41.0 (25/61) |
| Qualified success, % (*n/N*) |  |  |
| IOP ≥6 mmHg and <21 mmHg | Year 1  Year 2 | 26.2 (16/61) 29.5 (18/61) |
| IOP ≥6 mmHg and <18 mmHg | Year 1  Year 2 | 21.3 (13/61) 26.2 (16/61) |
| IOP ≥6 mmHg and <14 mmHg | Year 1  Year 2 | 21.3 (13/61) 27.9 (17/61) |

Overall success was defined as patients who were not pressure or surgical failures, with or without glaucoma medication. A target pressure zone was defined as IOP ≥6 mmHg and <21, <18, or
<14 mmHg. Pressure failure was defined as patients with an IOP outside of the target pressure zone or without a decrease in IOP ≥20% from baseline on two consecutive scheduled follow-up visits after 3 months and did not achieve a decrease in IOP ≥20% from baseline at the last visit in which the success rate was reported. Surgical failure was defined as patients requiring reoperation in the operating room; bleb needlings were not considered a reoperation. Complete and qualified success were defined as above but without glaucoma medications and with glaucoma medications, respectively. IOP, intraocular pressure; PP, per-protocol.
